# Supplementary material
Source: PubMed Central journal article supplement (PMC4533097)
Supplement: thnov05p1144s1.pdf [file thnov05p1144s1.pdf]

## Supporting Information

Manganese (II) chelate functionalized copper  
sulfide nanoparticles for efficient magnetic  
resonance/photoacoustic dual-modal imaging  
guided photothermal therapy

*Renfa Liu<sup>a</sup>, Lijia Jing<sup>a,c</sup>, Dong Peng<sup>b</sup>, Yong Li<sup>c</sup>, Jie Tian<sup>b</sup>, Zhifei Dai<sup>a,\*</sup>*

<sup>a</sup> Department of Biomedical Engineering, College of Engineering, Peking University,  
Beijing 100871, China

<sup>b</sup> Institute of Automation, Chinese Academy of Sciences, Beijing 100190, China

<sup>c</sup> School of Life Science and Technology, Harbin Institute of Technology, Harbin 150080,  
China

\*Corresponding author. E-mail address: [zhifei.dai@pku.edu.cn](mailto:zhifei.dai@pku.edu.cn)

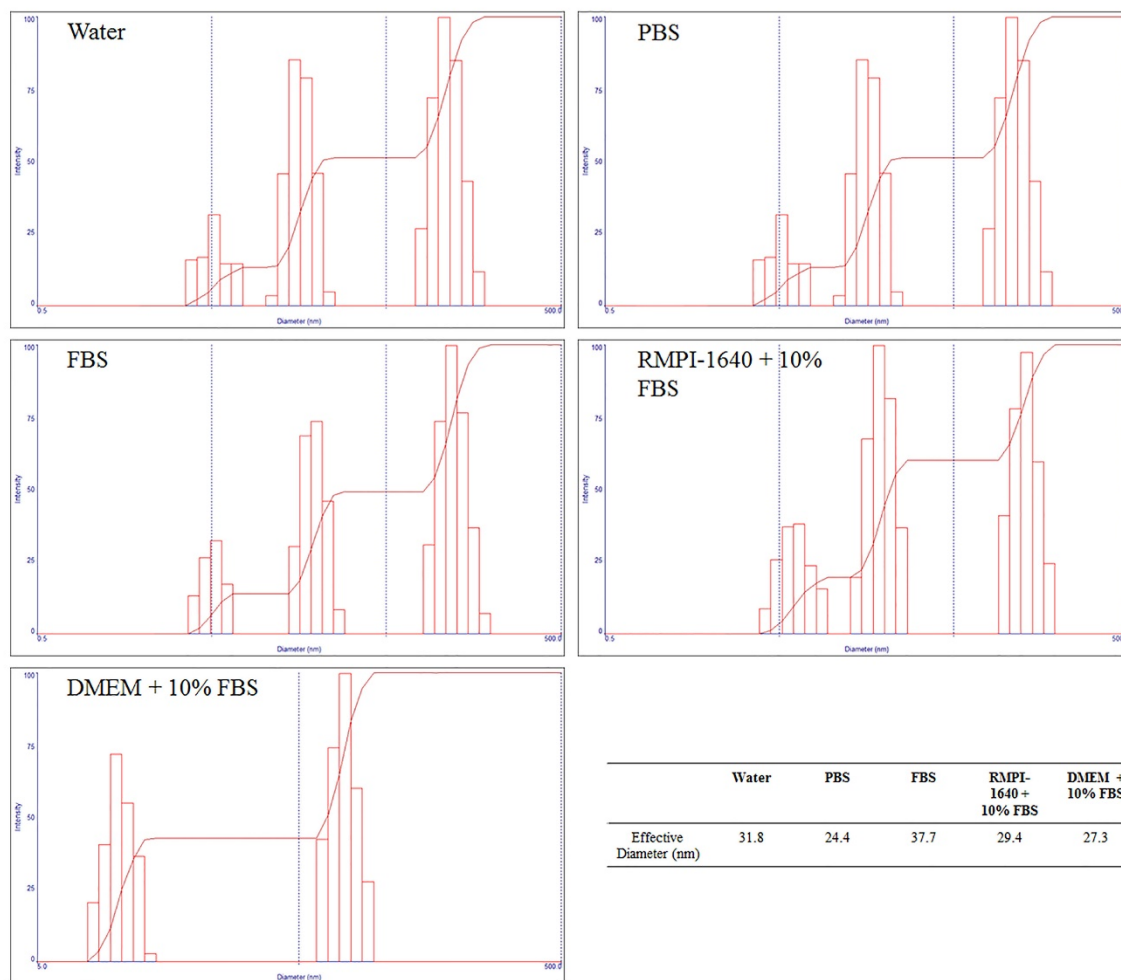

**Figure S1.** Size distribution and effective diameter of CuS@MPG NPs dispersed in water, PBS, fetal bovine serum (FBS), RMPI-1640 culture media containing 10% FBS and DMEM culture media containing 10% FBS determined by DLS tests.

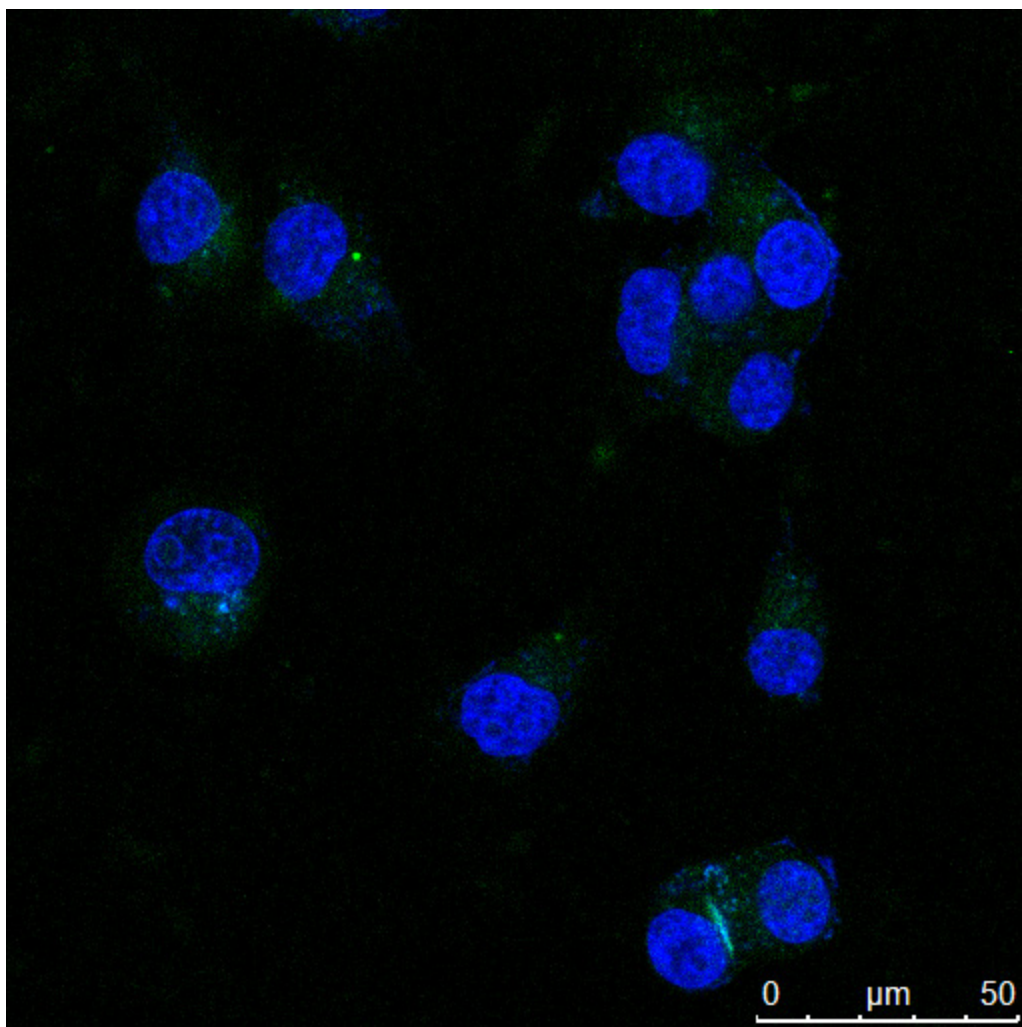

**Figure S2.** Cellular internalization of CuS@MPG NPs labeled with FITC after incubation for 4 h observed with confocal laser scanning microscope (Blue: DAPI; Green: FITC).

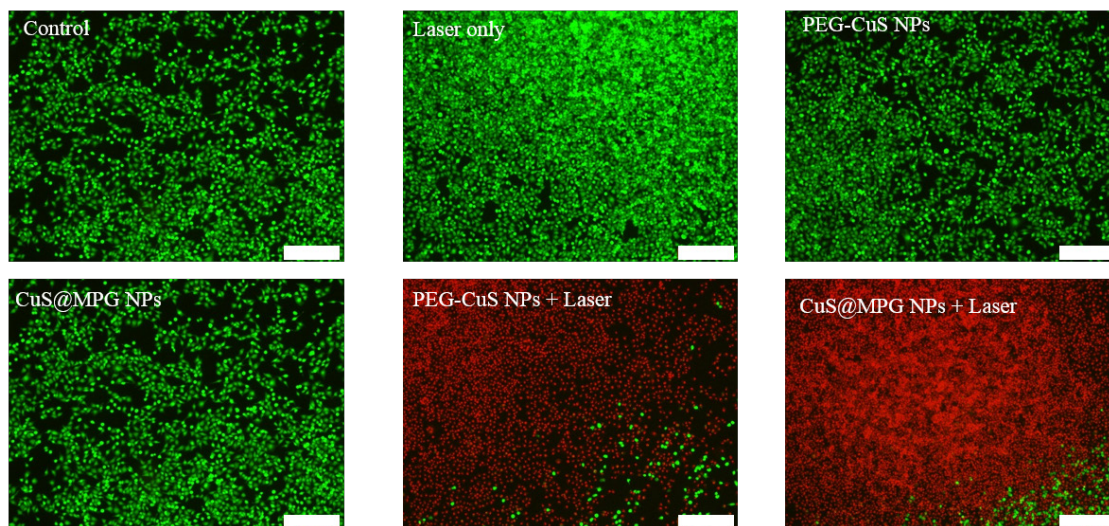

**Figure S3.** Fluorescence images of Calcein AM/PI co-stained MDA-MB-231 cells with different treatments: control, NIR laser treatment only, PEG-CuS NPs only, CuS@MPG NPs only, PEG-CuS NPs plus NIR laser irradiation and CuS@MPG NPs plus NIR laser irradiation. Scale bar = 200  $\mu\text{m}$ .

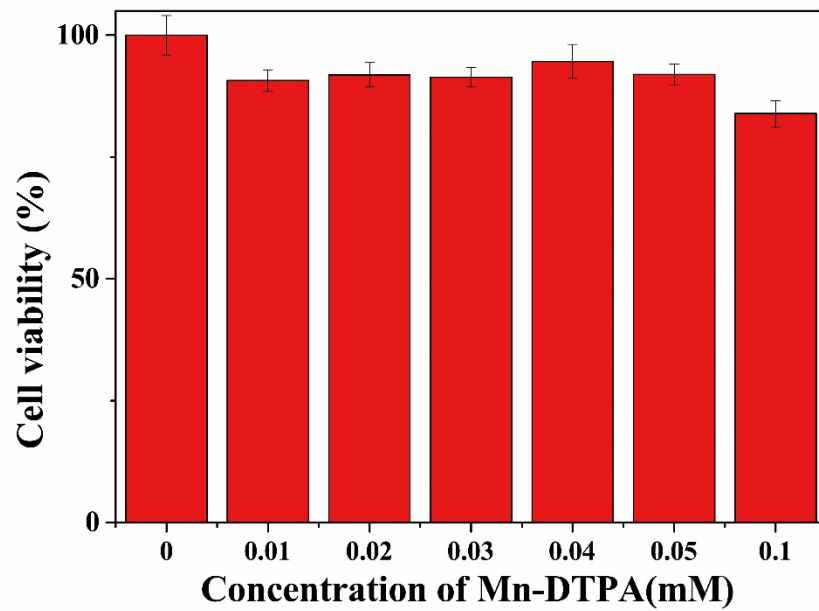

**Figure S4.** Cytotoxicity of Mn(II)-DTPA at different concentrations to MDA-MB-231 cells determined by MTT assay.

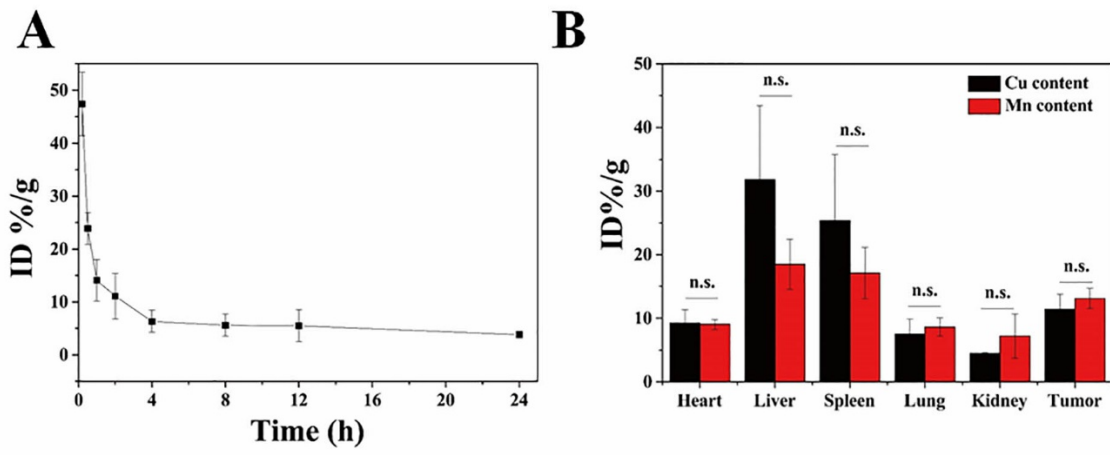

**Figure S5.** (A) Pharmacokinetic profile of CuS@MPG NPs following intravenous administration. (B) Biodistribution of CuS@MPG NPs at 24 h after intravenous injection in mice. Data represent means  $\pm$  standard deviations. n.s., no significant difference as defined by  $P > 0.05$ .
